# Supplementary material
Source: MDPI journal article supplement (https://www.mdpi.com/2077-0472/13/8/1531)
Supplement: s1 [file s1 › agriculture-2449425-supplementary.pdf]

# Agricultural Wastewater Treatment Using Oil Palm Waste Activated Hydrochar for Reuse in Plant Irrigation: Synthesis, Characterization, and Process Optimization

Ahmad Hussaini Jagaba <sup>1,2,\*</sup>, Faizah Mohammed Bashir <sup>3,\*</sup>, Ibrahim Mohammed Lawal <sup>2,4</sup>,  
Abdullahi Kilaco Usman <sup>5</sup>, Nura Shehu Aliyu Yaro <sup>1,6</sup>, Abdullahi Haruna Birniwa <sup>7</sup>,  
Haifa Youssef Hamdoun <sup>3</sup> and Nahla M. Shannan <sup>8</sup>

<sup>1</sup> Department of Civil and Environmental Engineering, Universiti Teknologi PETRONAS, Bandar Seri Iskandar 32610, Malaysia

<sup>2</sup> Department of Civil Engineering, Abubakar Tafawa Balewa University, Bauchi 740272, Nigeria

<sup>3</sup> Department of Decoration and Interior Design, University of Hail, Hail 55467, Saudi Arabia

<sup>4</sup> Department of Civil and Environmental Engineering, University of Strathclyde, Glasgow G4 0RE, UK

<sup>5</sup> School of Civil Engineering, Universiti Teknologi Malaysia, Johor Bahru 81310, Malaysia

<sup>6</sup> Department of Civil Engineering, Ahmadu Bello University, Zaria 810107, Nigeria

<sup>7</sup> Department of Chemistry, Sule Lamido University, Kafin-Hausa PMB 048, Nigeria

<sup>8</sup> Program in Electronics and Telecommunications Engineering Technology, Applied College, University of Hail, Hail 55467, Saudi Arabia

\* Correspondence: ahjagaba@atbu.edu.ng (A.H.J.); fai.bashir@uoh.edu.sa (F.M.B.)

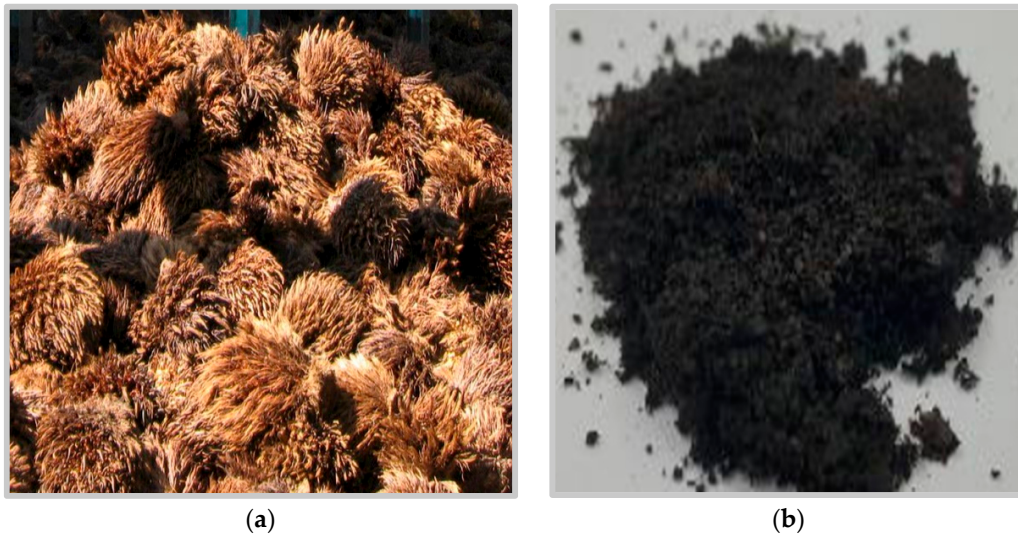

**Figure S1.** (a) Palm oil fruit bunches (PFB); (b) Oil palm activated hydrochar (OPAH).

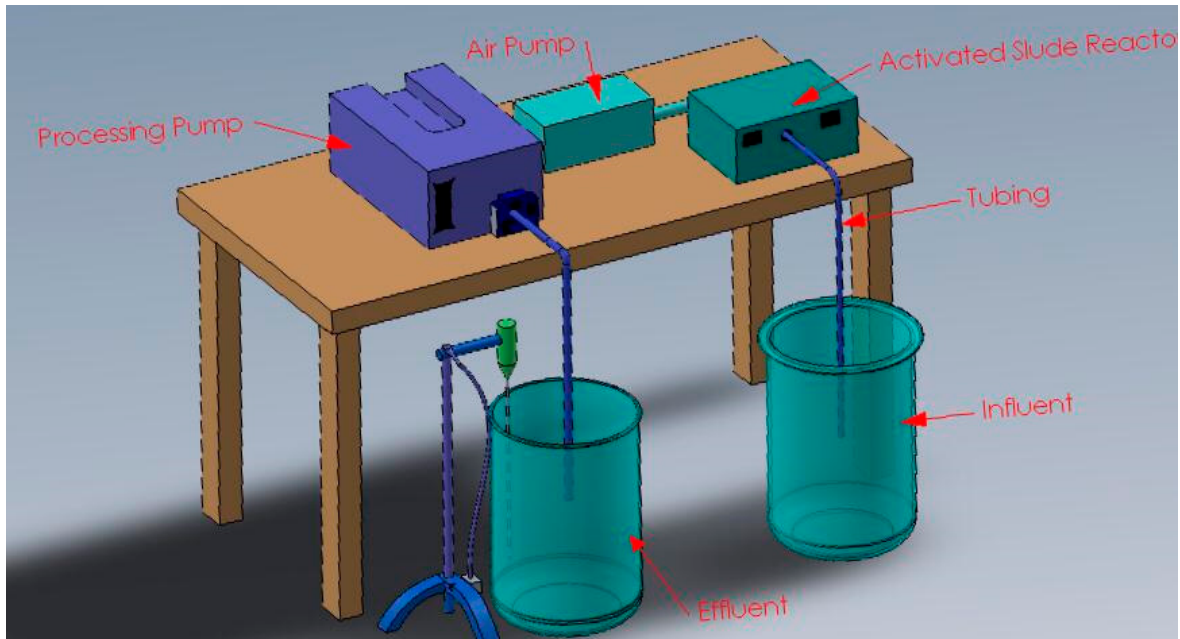

**Figure S2.** Schematic diagram of BASR set-up.

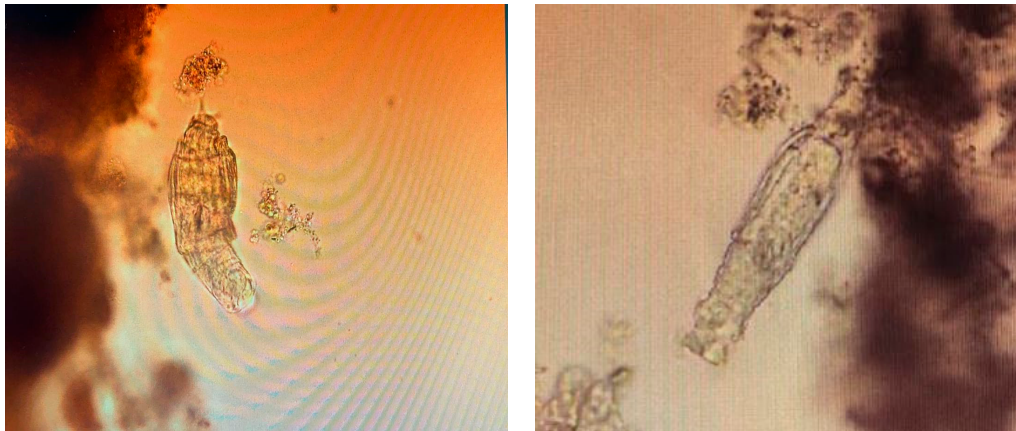

**Figure S3.** Images of Rotifer captured through microscope.

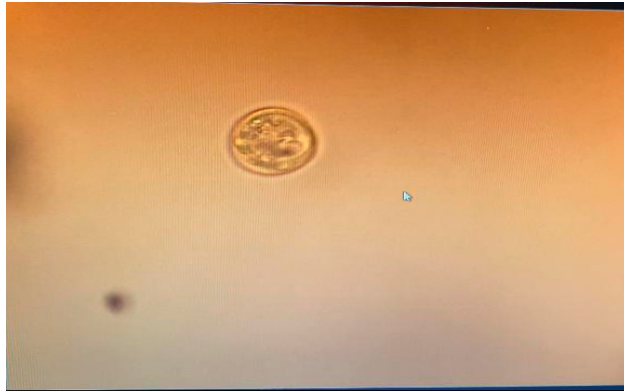

**Figure S4.** Image of Oocyst captured through microscope.
